# Supplementary material
Source: PubMed Central journal article supplement (PMC4563674)
Supplement: JCI77347sd.pdf [file JCI77347sd.pdf]

**sFigure 1**

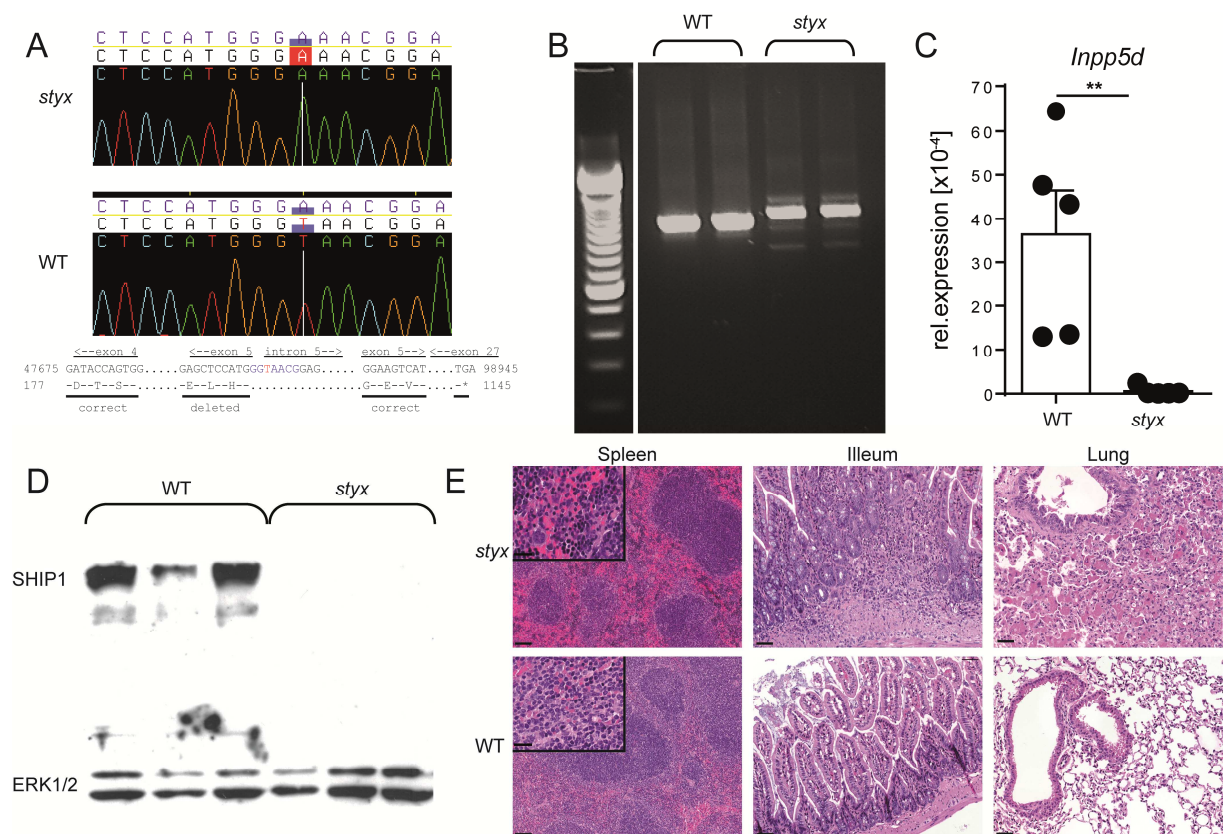

***Styx* mutant mice recapitulate the phenotype of *SHIP*<sup>-/-</sup> mice.** (A) Analysis of the genomic sequences of a *styx* mutant reveals a T to A transversion in the donor splice site of intron 5 (GTAAC→GAAAC) of the *Inpp5d* gene at position 49406 in the Genbank genomic region NC\_000067. This mutation is predicted to lead to skipping of the 141-nucleotide exon 5. (B) Altered *Inpp5d* cDNA species in *styx* compared with WT splenocytes. (C) Quantitative PCR of *Inpp5d* cDNA from splenocytes. The forward primer used for *Inpp5d* is specific for exon 5, which is skipped in mutant but not WT mice. Data (mean ± SEM) are pooled from two independent experiments, *n*=5 mice per group. (D) SHIP protein is not expressed in *styx* mutants. Western blot analysis of SHIP and ERK1/2 (loading control) in thioglycolate-elicited peritoneal cells of WT and *styx* mice (*n*=3 per group). (E) H&E staining of *styx* and WT spleen (scale bar: overview 100µm; inlay 20µm), ileum (scale bar: 50µm) and lung (scale bar: 50µm) of 12-week-old male mice. Statistics: (C) Standard Student's *t* test. group. \*\**P* < 0.01.

**sFigure 2**

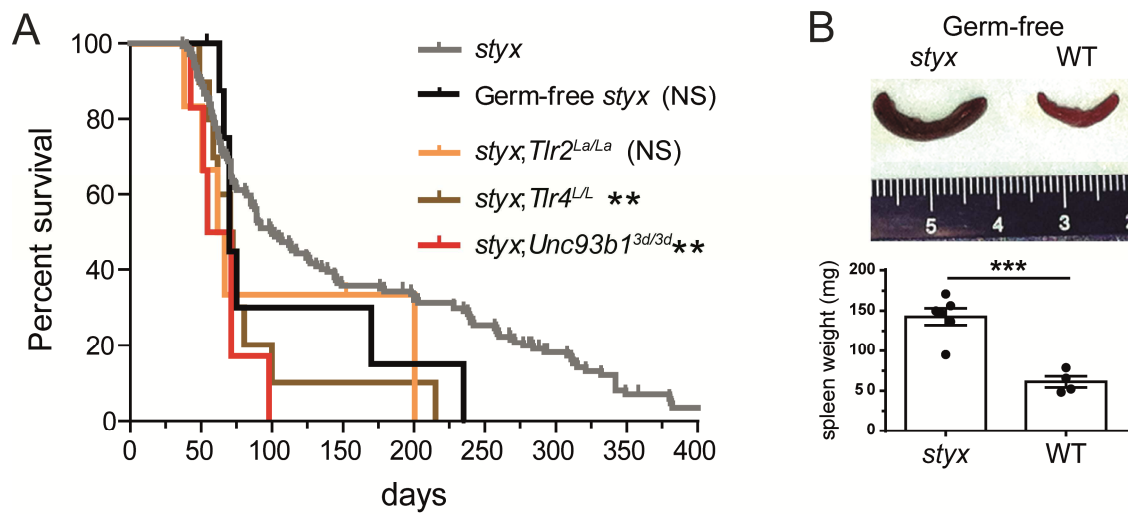

**Genetic deletion of TLR signaling or re-derivation into a germ-free environment does not prevent development of MPN-like disease in *styx* mice.** (A) Survival curve of SPF ( $n=142$ ) and germ-free ( $n=9$ ) *styx* mice and of SPF *styx* strains deficient for *Tlr2* ( $n=6$ ), *Tlr4* ( $n=10$ ) or *Unc93b1* ( $n=6$ ). (B) Representative spleens of germ-free *styx* and WT mice. Weights of the spleens of these mice are shown in the right panel. Pooled data (mean  $\pm$  SEM) from 4-6 mice per group. Survival curves for SPF *styx* mice represent the same group of mice as in Figure 1. Statistics: (A) log-rank (Mantel-Cox) test. (B) Standard Student's *t* test.  $**P < 0.01$ .

**sFigure 3**

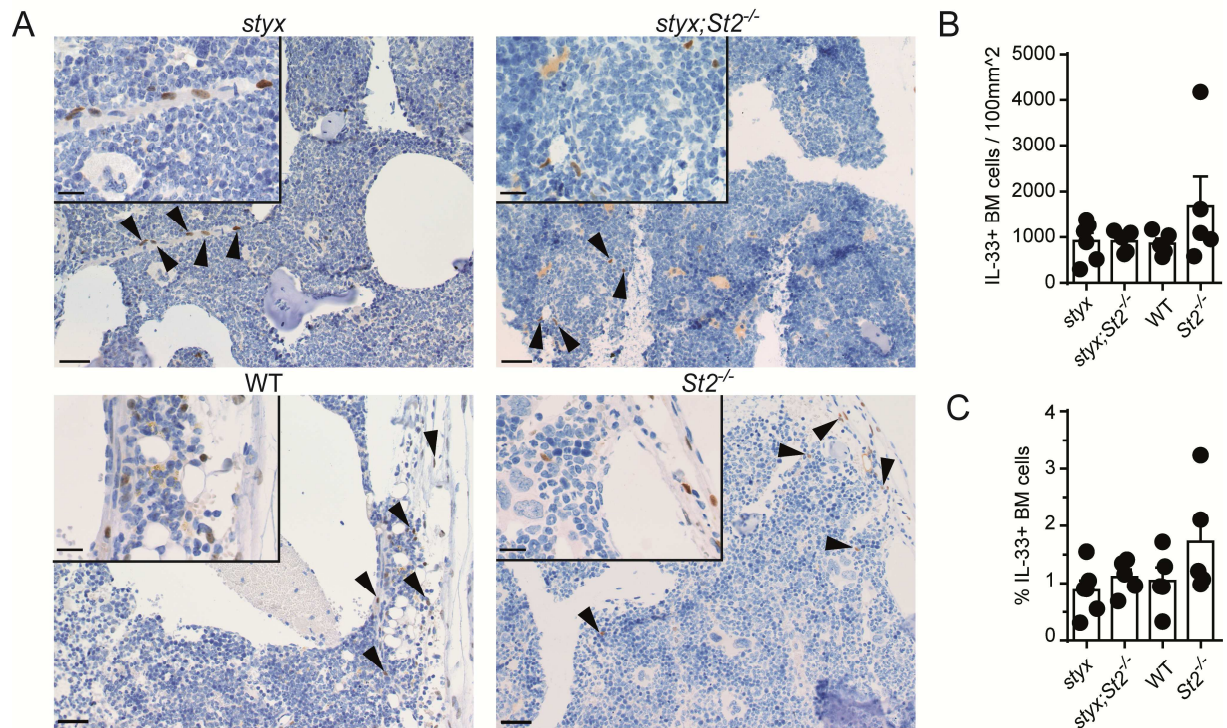

**IL-33 expression in mouse BM.** (A) Immunohistochemistry for IL-33 on BM sections of the indicated strains. Black arrows indicate IL-33<sup>+</sup> nuclei in cells with stromal or endothelial morphology (scale bars: overview: 50 μm; inlay: 20 μm). (B) Amount of IL-33<sup>+</sup> nuclei per 100mm<sup>2</sup>. (C) Percentage of IL-33<sup>+</sup> nuclei. Pooled data (mean ± SEM) of three independent experiments; *n*=5-6 mice per group.

**sFigure 4**

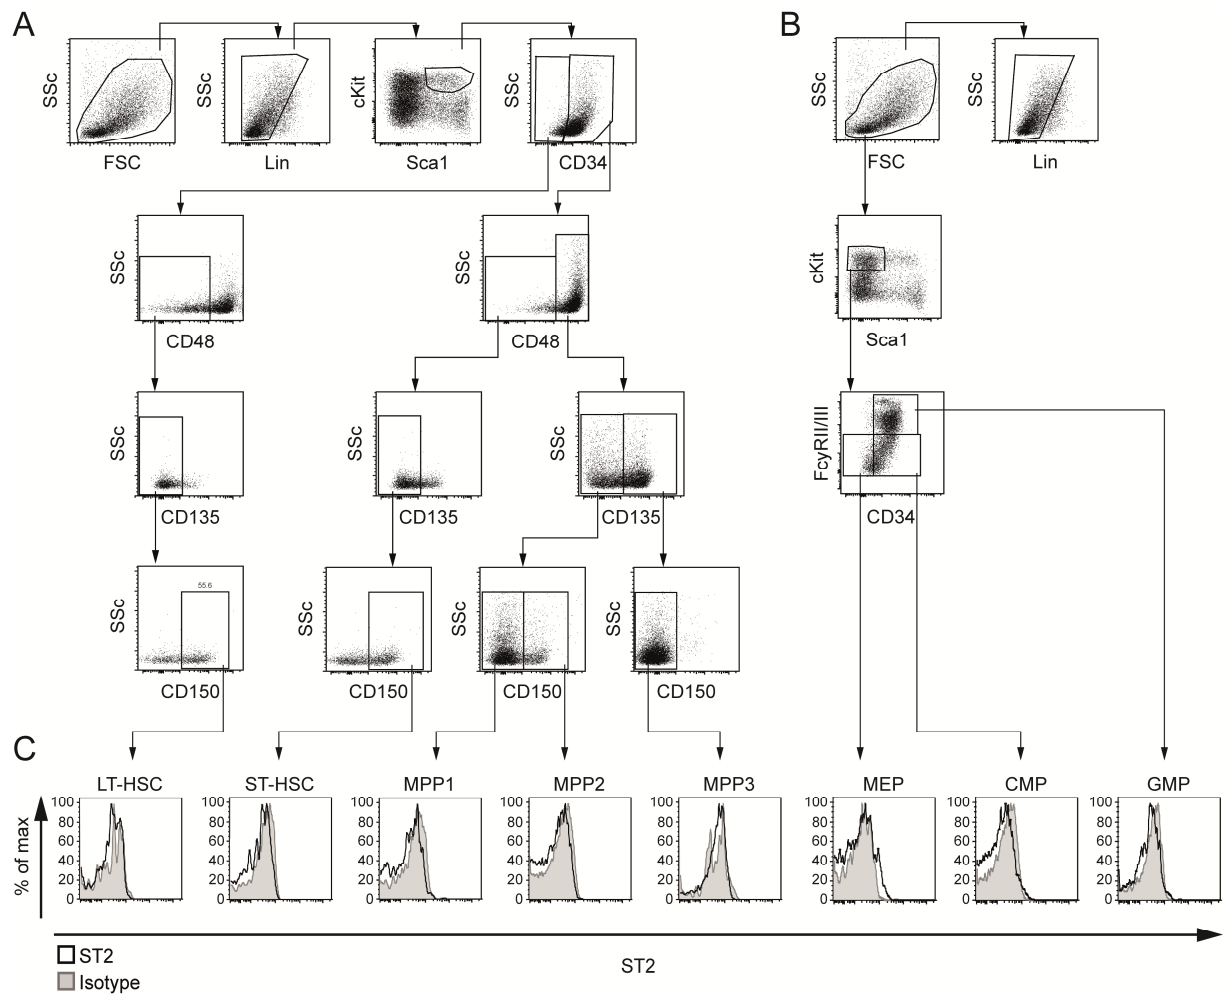

**Gating strategy and analysis of ST2 expression for murine HSCs and myeloid progenitors.** (A) Gating strategy for long-term (LT-HSC) and short-term (ST-HSC) HSCs, multipotent progenitors (MPP) MPP1, MPP2 and MPP3. (B) Gating strategy for megakaryocyte-erythroid progenitors (MEP), common myeloid progenitors (CMP) and granulocyte-macrophage progenitors (GMP). (C) ST2 expression on LT-HSC, ST-HSC, MPP1, MPP2, MPP3, MEP, CMP and GMP.

**sFigure 5**

**A**

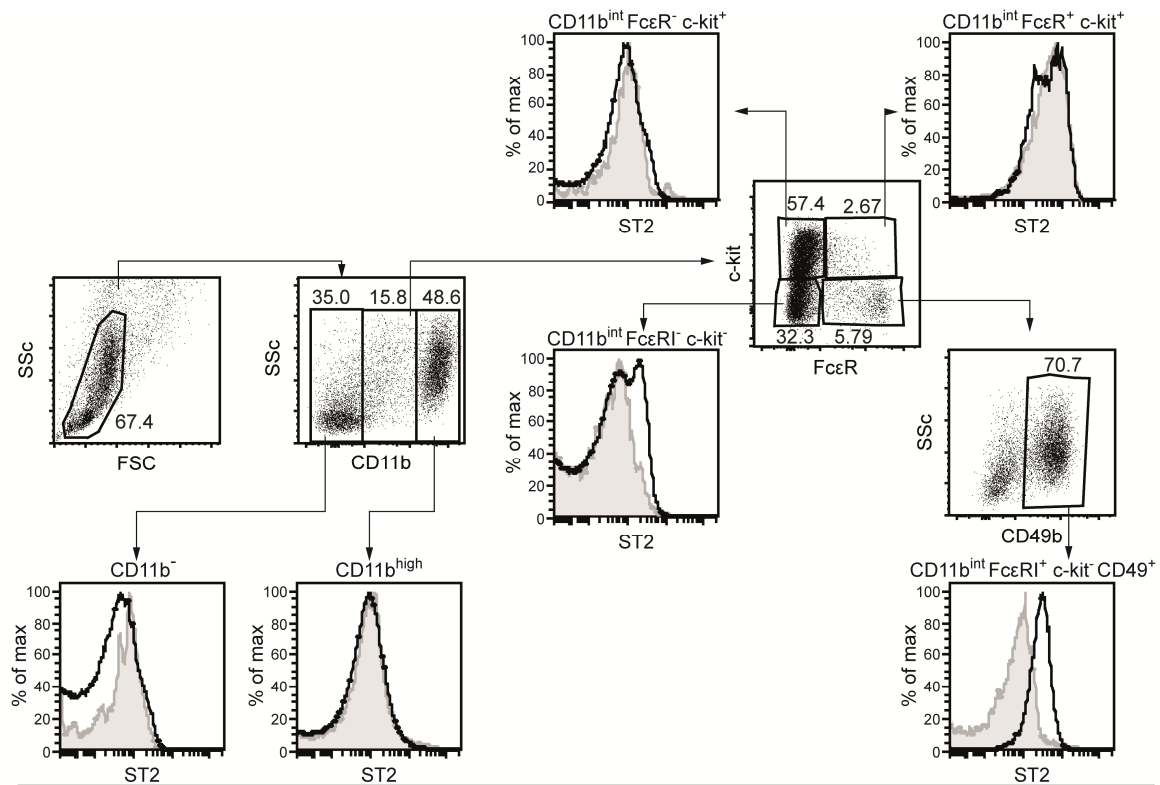

**B**

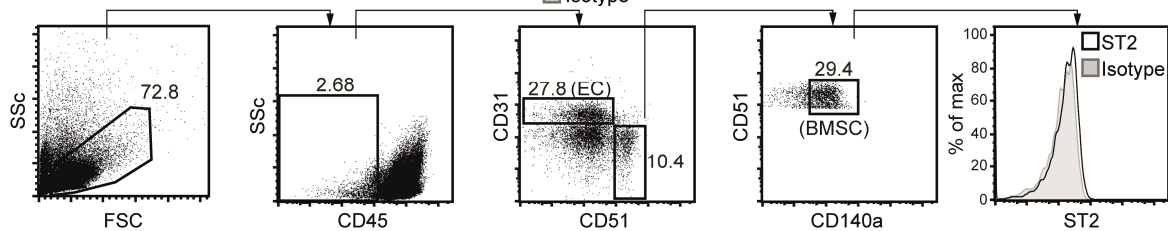

**Gating strategy used for the identification and FACS-purification of ST2<sup>+</sup> cells from mouse BM.** (A) Flow cytometric analysis of BM hematopoietic cells shows that ST2 is mainly expressed on basophils (CD11b<sup>int/+</sup>, FcεRI<sup>+</sup>, c-kit<sup>-</sup>, CD49b<sup>+</sup>) and to some extent on CD11b<sup>int</sup>, FcεRI<sup>-</sup>, c-kit<sup>-</sup> myeloid cells. (B) Gating strategy for the identification of the non-hematopoietic populations expressing ST2 in the BM. Endothelial cells are specified as CD45<sup>-</sup>, lin<sup>-</sup>, CD51<sup>-</sup>, CD31<sup>+</sup> and bone marrow stromal cells (BMSC) are defined as CD45<sup>-</sup>, lin<sup>-</sup>, CD31<sup>-</sup>, CD51<sup>+</sup>, CD140a<sup>+</sup>.

**sFigure 6**

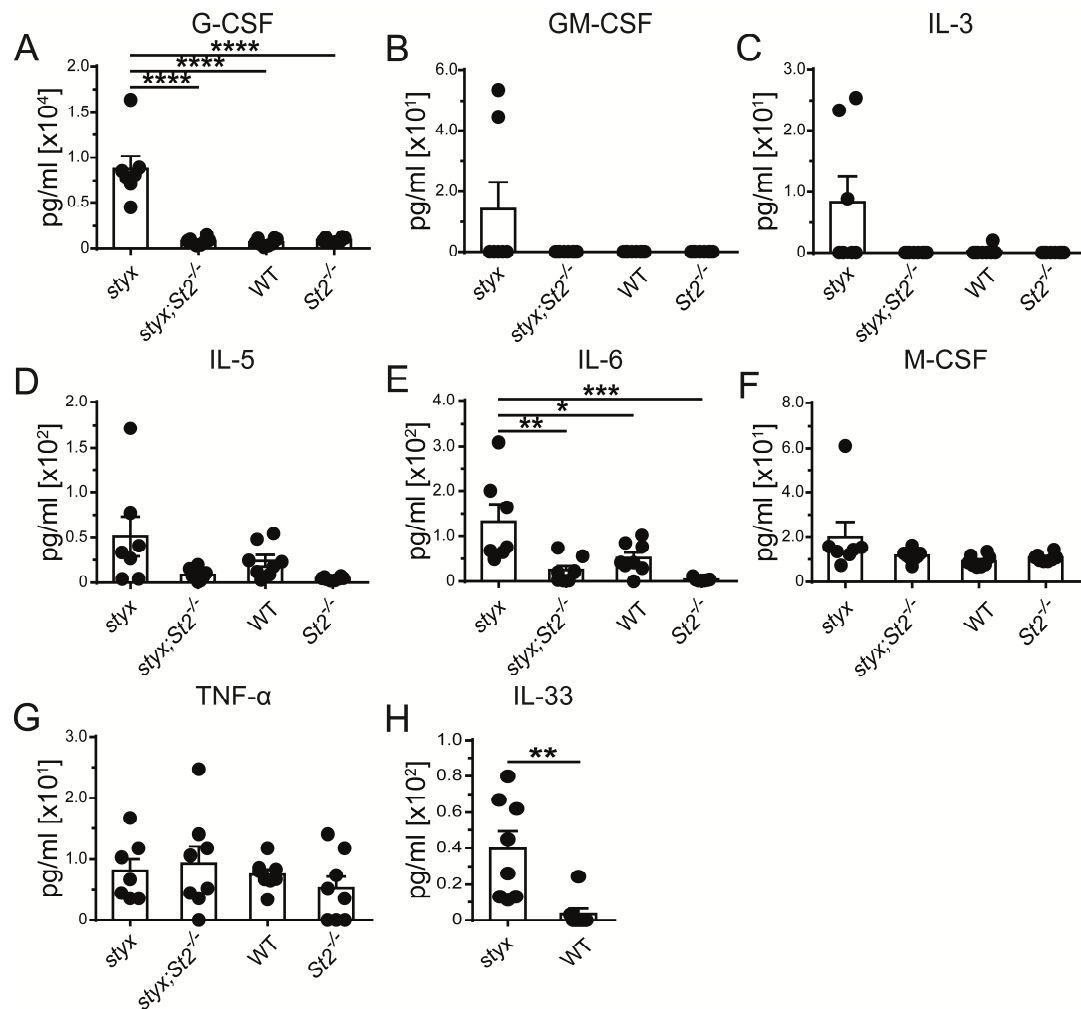

**Serum cytokine levels.** (A-H) 40-47-day-old mice of the indicated strains were bled and the indicated cytokines were measured in the serum by Multiplexing LASER Bead Technology. Statistics: (A-H) one-way ANOVA with Bonferroni post-test. Pooled data (mean  $\pm$  SEM) from two independent experiments with 7-8 mice per group. \* $P < 0.05$ ; \*\* $P < 0.01$ ; \*\*\* $P < 0.001$ ; \*\*\*\* $P < 0.001$ .



sFigure 7

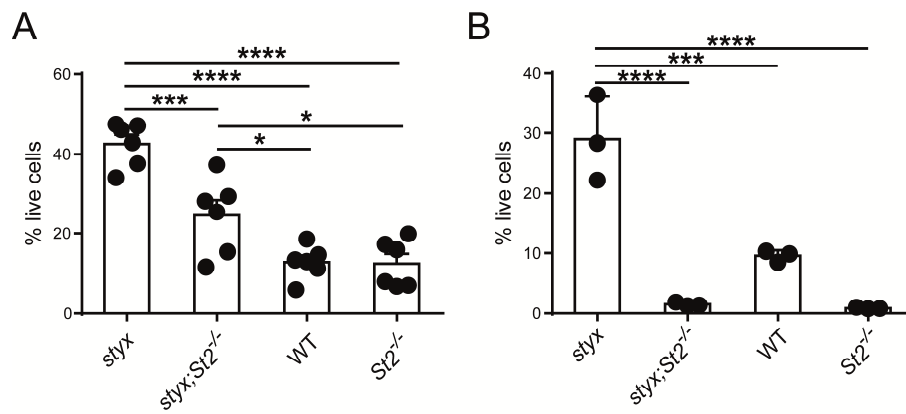

**Disruption of IL-33/ST2 signaling prevents the enhanced survival capacity of *Inpp5d*-deficient cells.** Frequencies of live (annexin V<sup>-</sup> / DAPI) BM CD11b<sup>+</sup> cells (A) 6h after isolation and (B) 48h after isolation and following stimulation with IL-33. Pooled data (mean  $\pm$  SEM) from (A) two independent experiments and (B) one experiment with 6 or 3 mice per group, respectively. Statistics: (A and B) one-way ANOVA with Bonferroni post-test. \* $P < 0.05$ ; \*\*\* $P < 0.001$ ; \*\*\*\* $P < 0.001$ .

**sFigure 8**

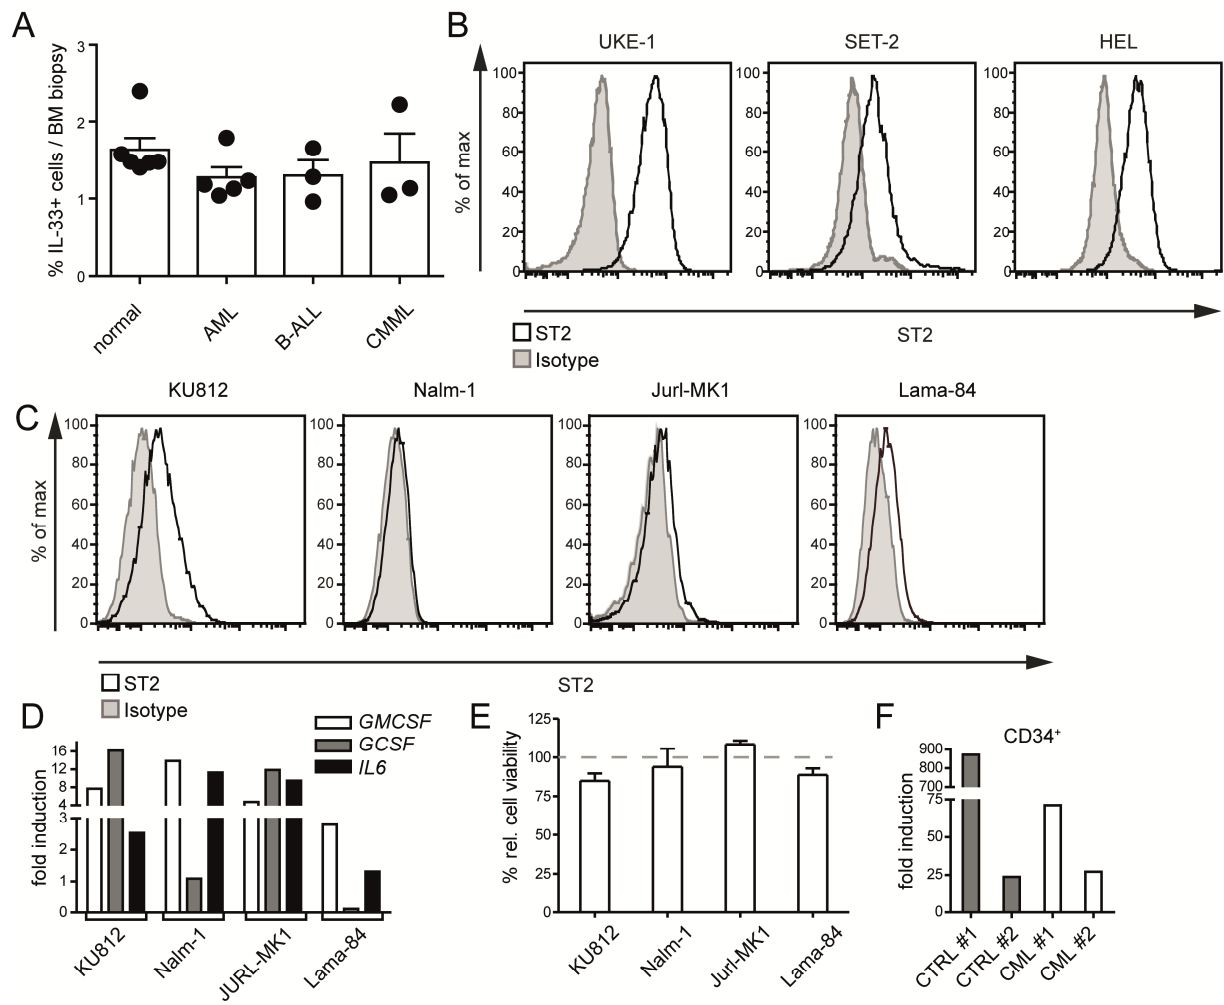



## sFigure 8 (legend)

**IL-33 and ST2 expression in human cells.** (A) Percentages of nuclei positive for IL-33 are similar between control ( $n=6$ ), acute myeloid leukemia (AML;  $n=5$ ), chronic myelomonocytic leukemia (CMML;  $n=3$ ) and B-acute lymphoblastic leukemia (B-ALL;  $n=3$ ) BM biopsies. Data are mean  $\pm$  SEM. Control BM biopsies represent the same group of control individuals as in Figure 8C. (B) ST2 expression levels are shown for the indicated *JAK2-V617F*<sup>+</sup> human cell lines and (C) BCR-ABL1<sup>+</sup> human CML lines. (D) Indicated BCR-ABL1<sup>+</sup> human CML cell lines were incubated for 24h  $\pm$  IL-33 and expression levels were measured for the transcripts of the indicated genes. Expression levels are represented as fold induction and have been normalized to conditions without IL-33. Means from two independent qPCR reactions from pooled biologic triplicates are represented. (E) Indicated BCR-ABL1<sup>+</sup> human CML cell lines were incubated for 72h  $\pm$  IL-33 and MTT assay was performed in triplicates. Data have been normalized to conditions without IL-33 and represent mean  $\pm$  SEM. Experiments were repeated three times. (F) MACS-purified CD34<sup>-</sup> blood cells from controls or from CML patients were cultured  $\pm$  IL-33 for 24h and transcription levels of *GMCSF* were measured. Each column represents one individual. Expression levels are represented as fold induction and have been normalized to conditions without IL-33.

**sFigure 9**

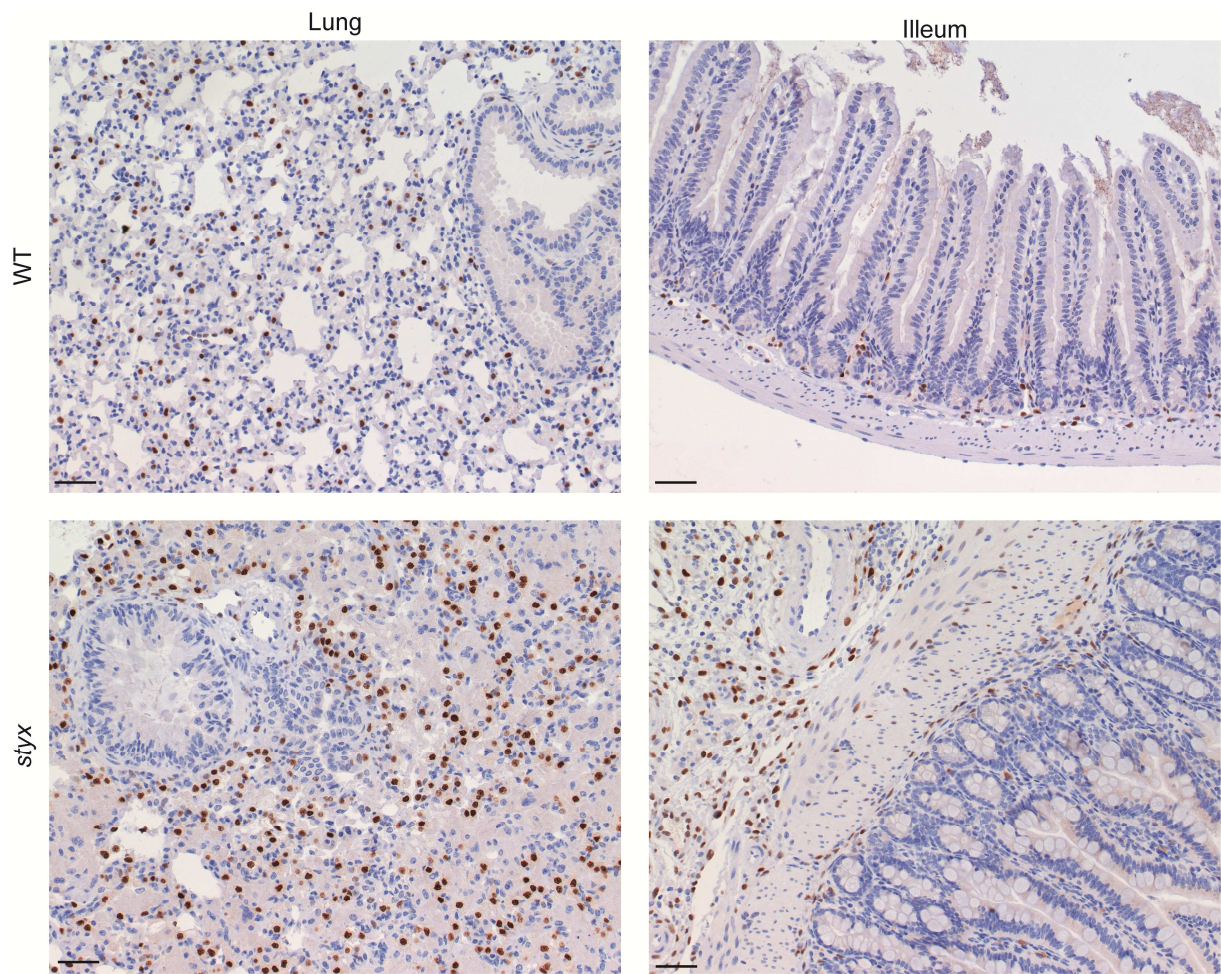

**IL-33 expression in mouse tissue.** IHC for IL-33 in lung sections and terminal ileum of the indicated strains at 11 weeks of age (scale bar: 50  $\mu$ m).

**sFigure 10**

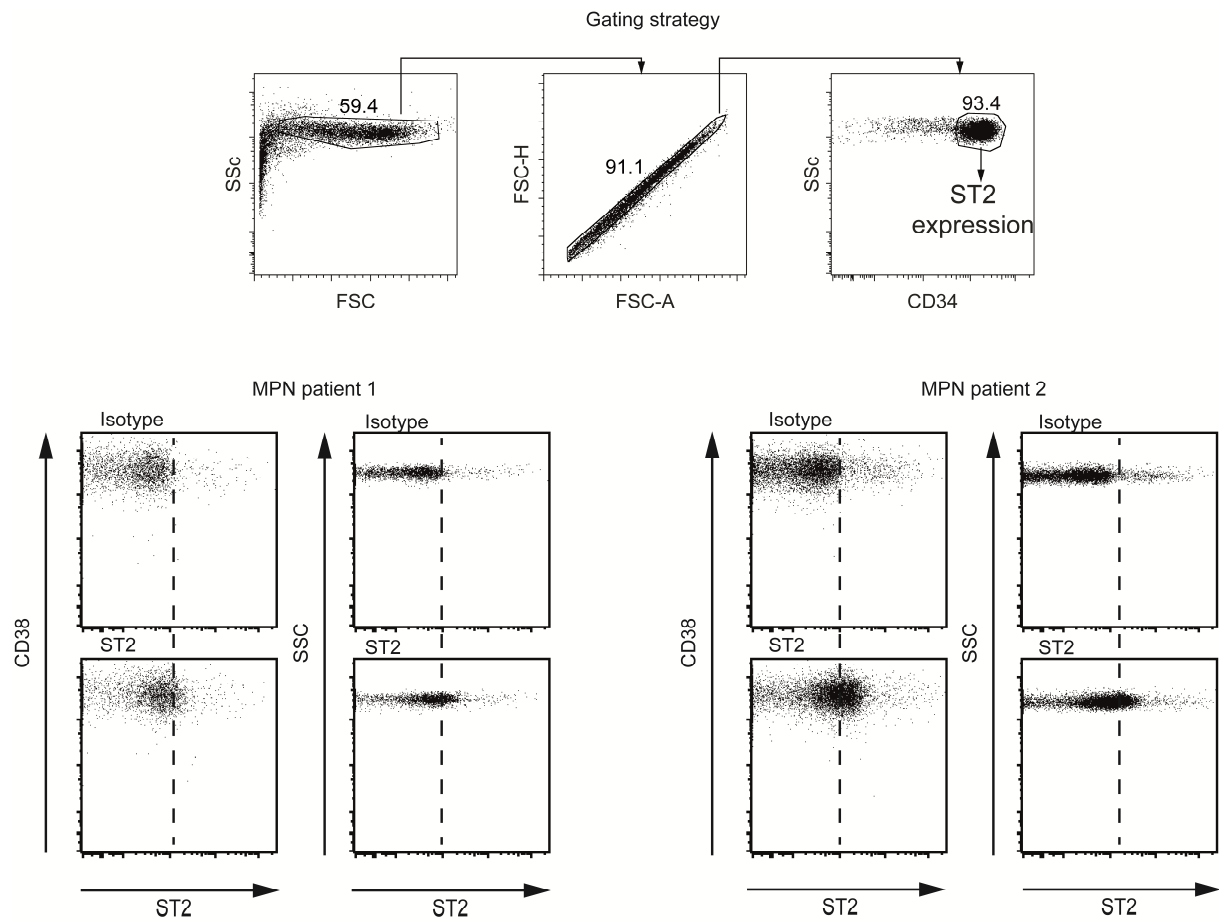

**Gating strategy for the analysis of ST2 expression on primary human CD34<sup>+</sup> stem/progenitor cells.** Flow cytometry dot plots are shown for two representative MPN patients. Expression of CD38 was assessed as a control and not used for histogram representation and data quantification.

**Supplemental Table 1 - Overview of the BM chimera experiments**

| <b>BM chimeras</b>          | <b>ST2 on radio-sensitive cells</b> | <b>ST2 on radio-resistant cells</b> | <b>Outcome</b>                                              | <b>Interpretation</b>                                                                                                                                                                     |
|-----------------------------|-------------------------------------|-------------------------------------|-------------------------------------------------------------|-------------------------------------------------------------------------------------------------------------------------------------------------------------------------------------------|
| styx→WT                     | +                                   | +                                   | Death<br>Mean survival: 37.5 days                           | MPN-like disease in chimeras develops from donor styx hematopoietic cells.<br>ST2 expression on both hematopoietic and radio-resistant cells leads to MPN-like disease                    |
| styx;St2-/-→<br>styx;St2-/- | -                                   | -                                   | Survival                                                    | MPN-like disease depends on ST2 expression.                                                                                                                                               |
| styx→St2-/-                 | +                                   | -                                   | Death<br>Mean survival: 38 days                             | MPN-like disease can develop independently of ST2 expression on radio-resistant cells                                                                                                     |
| styx;St2-/-<br>→WT          | -                                   | +                                   | Death<br>Mean survival: 56 days<br>Delayed MPN-like disease | MPN-like disease can develop independently of ST2 expression on hematopoietic cells. ST2 expression on radio-resistant cells contributes less than ST2 expression on hematopoietic cells. |
| styx→Il33-/-                | +                                   | +                                   | Survival                                                    | MPN-like disease depends on IL-33 from radio-resistant cells                                                                                                                              |

**Supplemental Table 2 - Antibodies, clones, conjugates and manufacturers**

Murine

| <b>Specificity</b>   | <b>Clone name</b> | <b>Conjugated to</b> | <b>Catalog number</b> | <b>Source</b> |
|----------------------|-------------------|----------------------|-----------------------|---------------|
| CD135                | A2F10             | PE                   | 135305                | Biologend     |
| Ly6A/E (Sca-1)       | D7                | PerCP-Cy5.5          | 45-5981-80            | eBioscience   |
| CD48                 | HM48-1            | Cy7                  | 103423                | Biologend     |
| CD150                | TC15-12F12.2      | APC                  | 115909                | Biologend     |
| CD117 (ckit)         | 2B8               | APC-Cy7              | 105825                | Biologend     |
| CD34                 | RAM34             | eFlour 450           | 48-0341-80            | eBioscience   |
| CD127                | SB/199            | PE                   | 121111                | Biologend     |
| CD16/32 (FcγRII/III) | 93                | PE-Cy7               | 101317                | Biologend     |
| CD4                  | GK1.5             | PE                   | 100407                | Biologend     |
| Ly6C                 | HK1.4             | PerCP-Cy5.5          | 128011                | Biologend     |
| CD11b                | M1/70             | PE-Cy7               | 101215                | Biologend     |
| CD8                  | 53-6.7            | APC                  | 17-0081-81            | eBioscience   |
| CD19                 | 6D5               | APC-Cy7              | 115529                | Biologend     |
| Ly6G                 | 1A8               | Pacific Blue         | 127611                | Biologend     |
| Cd11c                | N418              | APC/Cy7              | 117323                | Biologend     |
| FcεR1α               | MAR-1             | FITC                 | 134305                | Biologend     |
| ST2 (IL-33R)         | RMST2-2           | PerCP-eFluor® 710    | 46-9335-80            | eBioscience   |
| CD49b                | DX5               | Pacific Blue         | 108917                | Biologend     |
| Annexin V            |                   | FITC                 | 640905                | Biologend     |
| CD45                 | 104               | PE                   | 109807                | Biologend     |
| CD31                 | 390               | FITC                 | 11-0311-81            | eBioscience   |
| CD140a               | APA5              | PE                   | 12-1401-81            | eBioscience   |

|      |       |                 |             |           |
|------|-------|-----------------|-------------|-----------|
| CD51 | RMV-7 | Alexa Flour 647 | MCA2461A647 | Serotec   |
| CD45 | 104   | Alexa Flour 700 | 109821      | Biologend |

Human

| <b>Specificity</b> | <b>Clone name</b> | <b>Conjugated to</b> | <b>Catalog number</b> | <b>Source</b>   |
|--------------------|-------------------|----------------------|-----------------------|-----------------|
| ST2                | FAB523P           | PE                   | FAB523P               | R&D             |
| CD34               | 561               | APC                  | 343607                | Biologend       |
| CD38               | HIT2              | PECy7                | 303515                | Biologend       |
| Annexin V          | -                 | FITC                 | 640905                | Biologend       |
| ST2                | B46E              | Biotin               | 101002                | MBD Bioproducts |
| Biotin             | -                 | PE                   | 405203                | Biologend       |
